# Supplementary material
Source: Springer Nature journal article supplement (https://www.springermedizin.de/resource/supplementary/13054_2012_1683_MOESM3_ESM.pdf/9711258)

**A**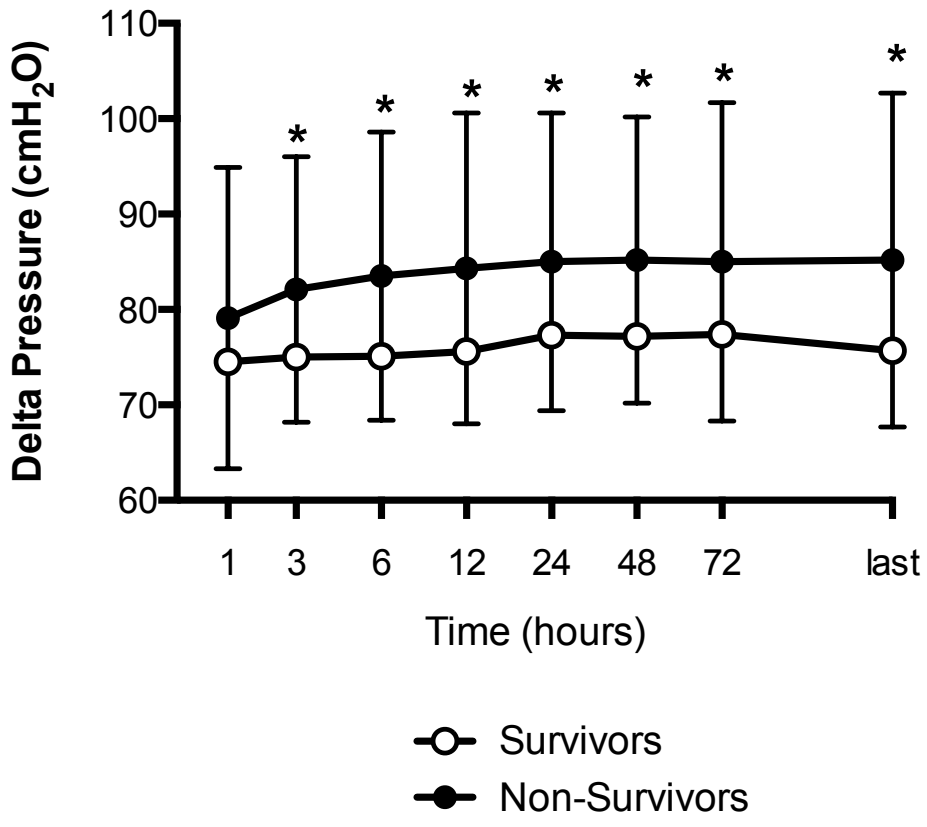**B**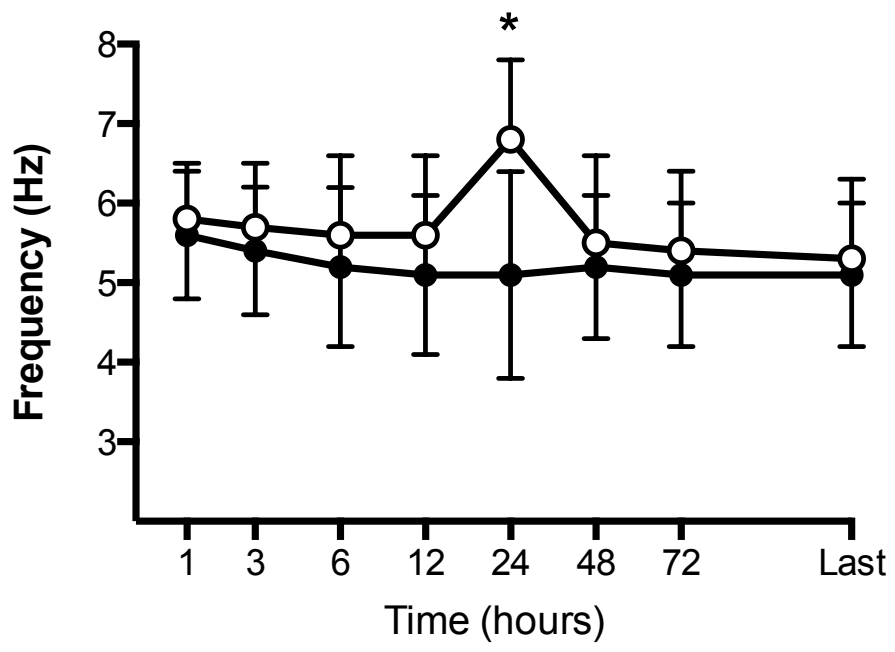

Supplement: MOESM3 [file 9711258]
